# Supplementary material for: Molecular interactions of 2′-deoxyguanosine 5′-monophosphate with glycine in aqueous media probed via concentration and pH dependent Raman spectroscopic investigations and DFT study
Source: Royal Society of Chemistry journal article supplement (doi:10.1039/c2cp41205e), 2012-01-01
Supplement: c2cp41205e.pdf [file c2cp41205e.pdf]

## Supplementary information

Fig. S1

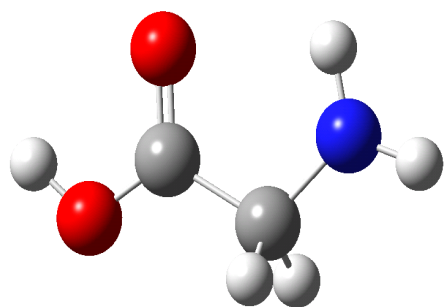

(a) Gly (N)

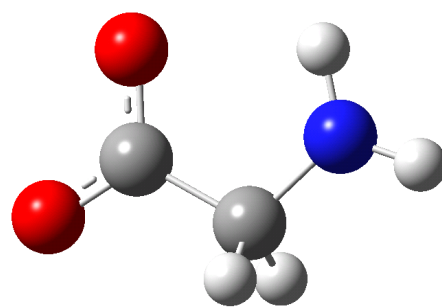

(b) Gly (D)

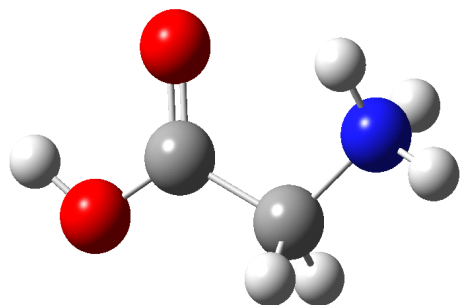

(c) Gly (P)

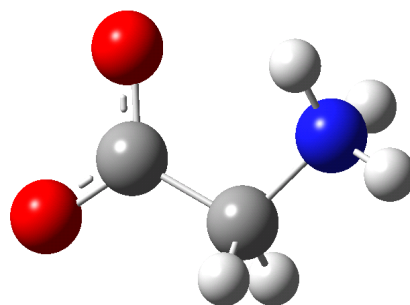

(d) Gly (Z)

**Figure S1:** (a) Neutral Glycine, Gly (N); (b) Deprotonated Glycine, Gly (D); (c) Protonated Glycine, Gly (P); (d) Zwitterionic Glycine, Gly (Z).

Fig. S2

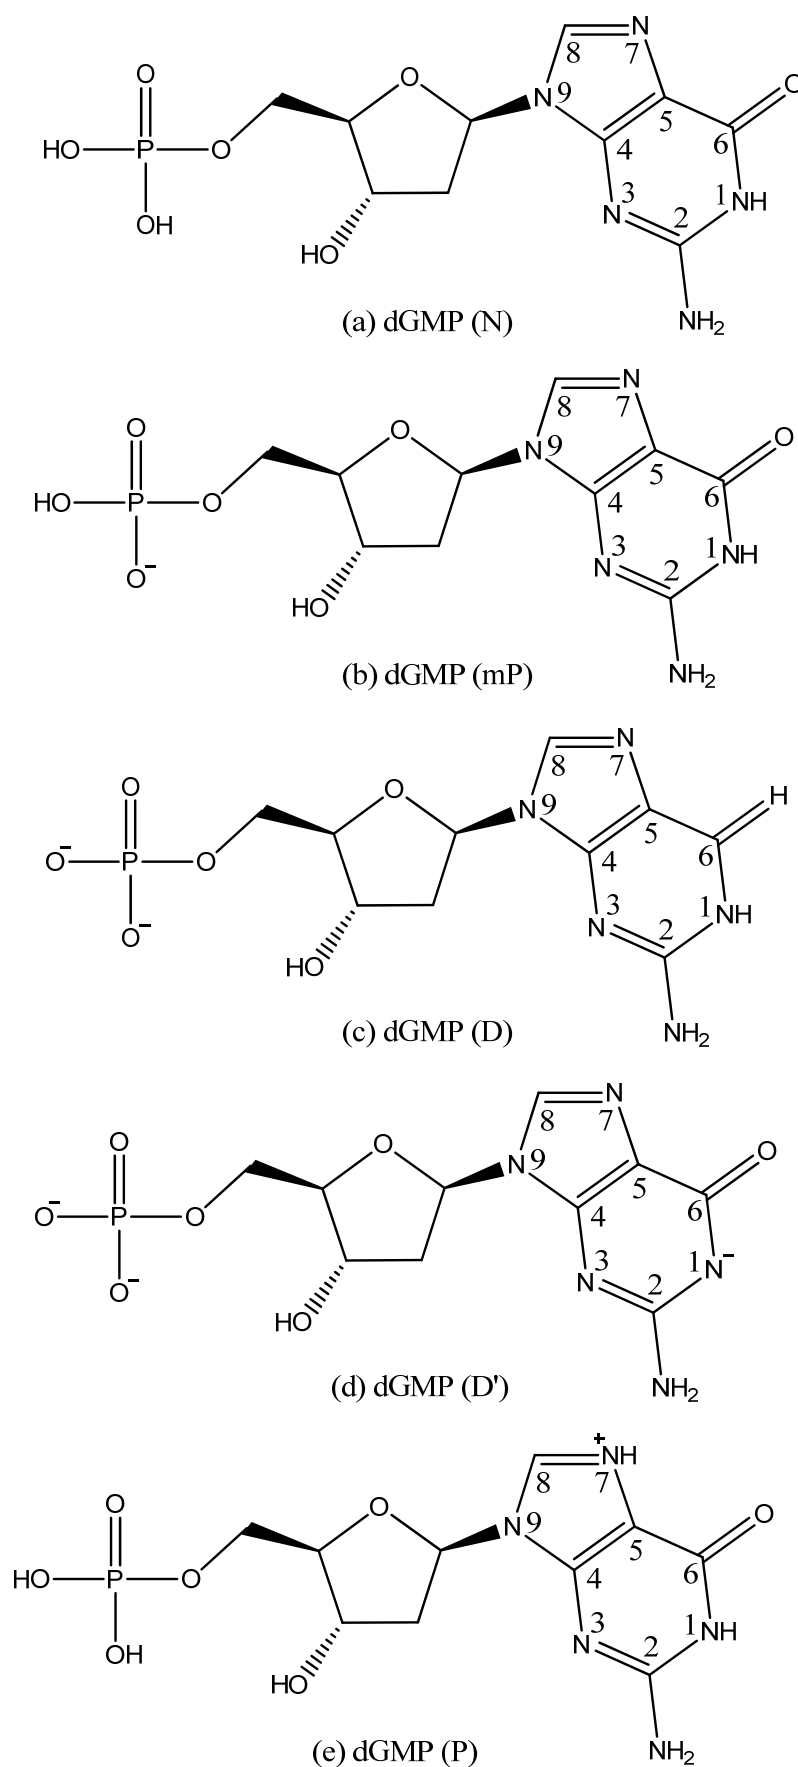

**Figure S2:** Different protonic states of dGMP **(a)** Neutral, dGMP (N); **(b)** Monoprotonated, dGMP (mP); **(c)** Deprotonated, dGMP (D); **(d)** Deprotonation of the guanosine moiety at N1 site, dGMP (D'); **(e)** Protonation of the guanosine moiety at N7 site, dGMP (P).

**Table S1. Calculated bond lengths (Å) for dGMP, (dGMP + 1Gly + 5W) and (dGMP + 2Gly + 5W) obtained using B3LYP method employing 6-311+G(d,p) basis set**

| Bond length                      | dGMP  | dGMP+1Gly +5W | dGMP+2Gly +5W |
|----------------------------------|-------|---------------|---------------|
| O <sub>19</sub> -C <sub>18</sub> | 1.213 | 1.232         | 1.253         |
| C <sub>17</sub> -C <sub>18</sub> | 1.437 | 1.425         | 1.413         |
| N <sub>20</sub> -C <sub>18</sub> | 1.440 | 1.411         | 1.394         |
| N <sub>20</sub> -C <sub>22</sub> | 1.368 | 1.378         | 1.380         |
| N <sub>26</sub> -C <sub>22</sub> | 1.308 | 1.335         | 1.337         |
| C <sub>27</sub> -N <sub>26</sub> | 1.356 | 1.353         | 1.348         |
| C <sub>27</sub> -C <sub>17</sub> | 1.392 | 1.393         | 1.396         |
| C <sub>17</sub> -N <sub>16</sub> | 1.379 | 1.384         | 1.382         |
| N <sub>16</sub> -C <sub>14</sub> | 1.304 | 1.304         | 1.302         |
| C <sub>14</sub> -N <sub>13</sub> | 1.390 | 1.382         | 1.387         |
| N <sub>13</sub> -C <sub>27</sub> | 1.375 | 1.382         | 1.381         |
| C <sub>14</sub> -H <sub>15</sub> | 1.078 | 1.076         | 1.076         |
| N <sub>20</sub> -H <sub>21</sub> | 1.012 | 1.022         | 1.026         |
| C <sub>22</sub> -N <sub>23</sub> | 1.376 | 1.338         | 1.333         |
| N <sub>23</sub> -H <sub>24</sub> | 1.009 | 1.020         | 1.021         |
| N <sub>23</sub> -H <sub>25</sub> | 1.009 | 1.021         | 1.022         |
| N <sub>13</sub> -C <sub>11</sub> | 1.446 | 1.460         | 1.467         |
| C <sub>11</sub> -O <sub>10</sub> | 1.426 | 1.424         | 1.421         |
| O <sub>10</sub> -C <sub>8</sub>  | 1.433 | 1.437         | 1.437         |
| C <sub>8</sub> -C <sub>28</sub>  | 1.544 | 1.539         | 1.536         |
| C <sub>28</sub> -C <sub>30</sub> | 1.529 | 1.531         | 1.533         |
| C <sub>30</sub> -H <sub>31</sub> | 1.092 | 1.090         | 1.088         |
| C <sub>30</sub> -H <sub>32</sub> | 1.091 | 1.091         | 1.091         |
| C <sub>28</sub> -O <sub>33</sub> | 1.430 | 1.432         | 1.430         |
| O <sub>33</sub> -H <sub>34</sub> | 0.962 | 0.963         | 0.963         |
| C <sub>28</sub> -H <sub>29</sub> | 1.094 | 1.094         | 1.094         |
| C <sub>8</sub> -C <sub>5</sub>   | 1.516 | 1.519         | 1.519         |
| C <sub>5</sub> -H <sub>6</sub>   | 1.091 | 1.092         | 1.092         |
| C <sub>5</sub> -H <sub>7</sub>   | 1.094 | 1.095         | 1.095         |
| C <sub>5</sub> -O <sub>4</sub>   | 1.451 | 1.452         | 1.450         |
| O <sub>4</sub> -P <sub>1</sub>   | 1.605 | 1.607         | 1.614         |
| P <sub>1</sub> -O <sub>3</sub>   | 1.469 | 1.487         | 1.488         |
| P <sub>1</sub> -O <sub>35</sub>  | 1.602 | 1.574         | 1.565         |
| P <sub>1</sub> -O <sub>2</sub>   | 1.625 | 1.614         | 1.618         |
| O <sub>35</sub> -H <sub>36</sub> | 0.965 | 1.010         | 1.030         |
| O <sub>2</sub> -H <sub>37</sub>  | 0.965 | 0.965         | 0.964         |
